# Supplementary material for: Hydroxychloroquine and chloroquine for treatment of coronavirus disease 19 (COVID-19): a systematic review and meta-analysis of randomized and non-randomized controlled trials
Source: PubMed Central journal article supplement — J Thorac Dis. 2021 Jan;13(1):202–12. doi: 10.21037/jtd-20-2022 (PMC7867802; doi:10.21037/jtd-20-2022), 2021-01
Supplement: jtd-13-01-202-supplementary.pdf [file jtd-13-01-202-supplementary.pdf]

## Appendix 1 Search formulas

## PubMed

(ncov OR covid OR 2019-nCoV OR COVID-19 OR (wuhan and coronavirus) OR sars-cov OR (2019 novel coronavirus)) AND (chloroquine or hydroxychloroquine)

## Web of Science

TS = (ncov OR covid OR 2019-nCoV OR COVID-19 OR (wuhan and coronavirus) OR sars-cov OR (2019 novel coronavirus)) AND TS = (chloroquine or hydroxychloroquine)

## Embase

(ncov OR covid OR '2019 ncov' OR 'covid 19'/exp OR 'covid 19' OR (wuhan AND ('coronavirus'/exp OR coronavirus)) OR 'sars cov'/exp OR 'sars cov' OR '2019 novel coronavirus'/exp OR '2019 novel coronavirus' OR (2019 AND novel AND ('coronavirus'/exp OR coronavirus))) AND ('chloroquine'/exp OR chloroquine OR 'hydroxychloroquine'/exp OR hydroxychloroquine)

## Cochrane

#1 ncov OR covid OR sars-cov OR novel coronavirus  
 #2 chloroquine or hydroxychloroquine  
 #3 #1 and #2

## MedRxiv

chloroquine or hydroxychloroquine

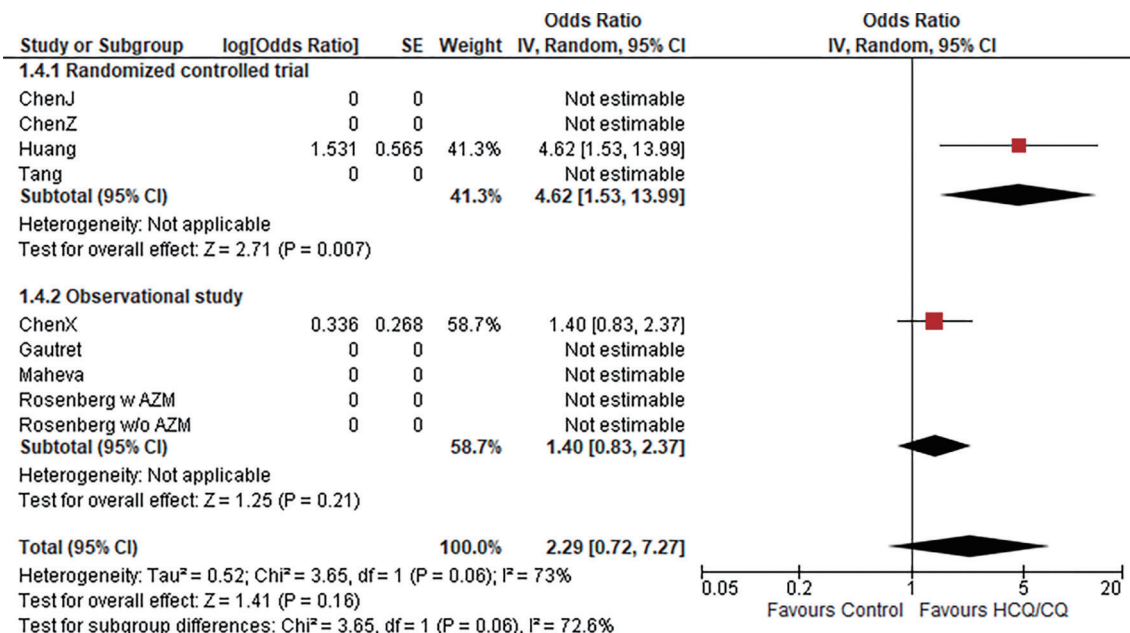

**Figure S1** A forest plot for time to discharge. Rosenberg w AZM (with AZM): “HCQ + AZM versus AZM alone”. Rosenberg w/o AZM (without AZM): “HCQ alone versus neither of them”. SE, standard error; 95% CI, 95% confidence interval; IV, inverse variance; M-H, Mantel-Haenszel; HCQ/CQ, hydroxychloroquine/chloroquine; AZM, azithromycin.

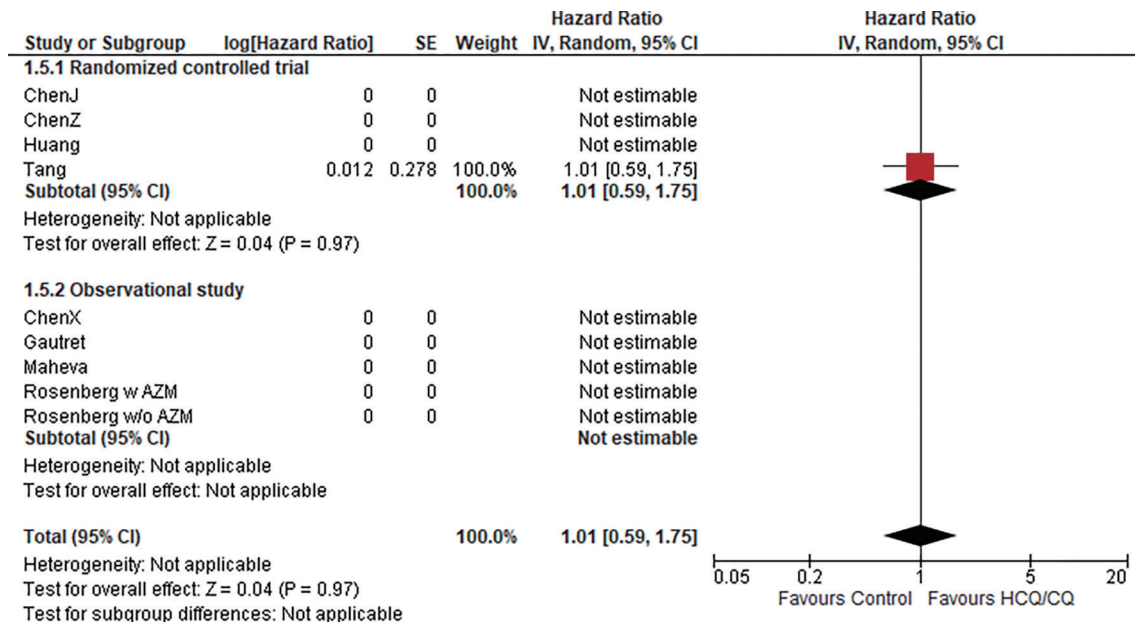

**Figure S2** A forest plot for time to symptom alleviation. Rosenberg w AZM (with AZM): “HCQ + AZM versus AZM alone”. Rosenberg w/o AZM (without AZM): “HCQ alone versus neither of them”. SE, standard error; 95% CI, 95% confidence interval; IV, inverse variance; M-H, Mantel-Haenszel; HCQ/CQ, hydroxychloroquine/chloroquine; AZM, azithromycin.

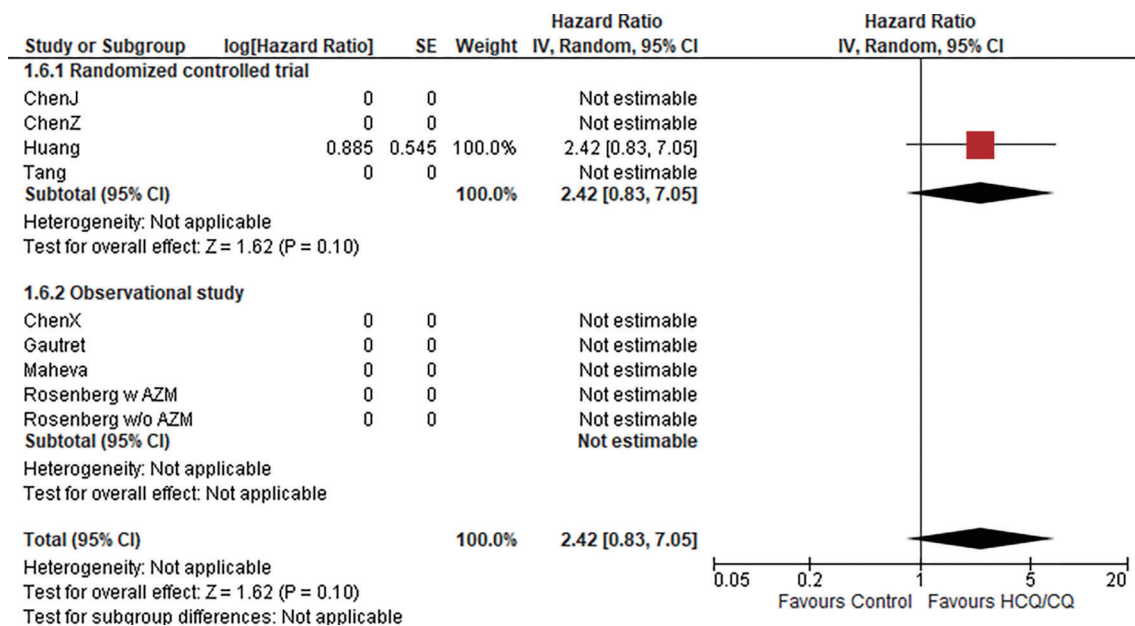

**Figure S3** A forest plot for time to CT image improvement. Rosenberg w AZM (with AZM): “HCQ + AZM versus AZM alone”. Rosenberg w/o AZM (without AZM): “HCQ alone versus neither of them”. SE, standard error; 95% CI, 95% confidence interval; IV, inverse variance; M-H, Mantel-Haenszel; HCQ/CQ, hydroxychloroquine/chloroquine; AZM, azithromycin.

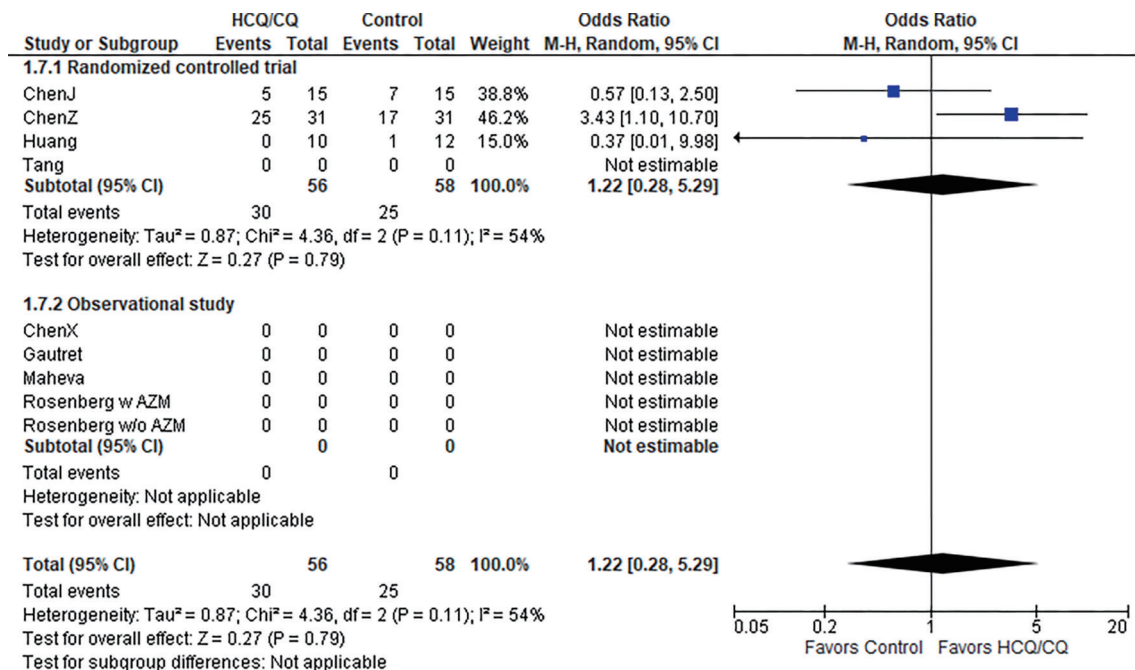

**Figure S4** A forest plot for CT image improvement at day 7. Rosenberg w AZM (with AZM): “HCQ + AZM versus AZM alone”. Rosenberg w/o AZM (without AZM): “HCQ alone versus neither of them”. SE, standard error; 95% CI, 95% confidence interval; IV, inverse variance; M-H, Mantel-Haenszel; HCQ/CQ, hydroxychloroquine/chloroquine; AZM, azithromycin.

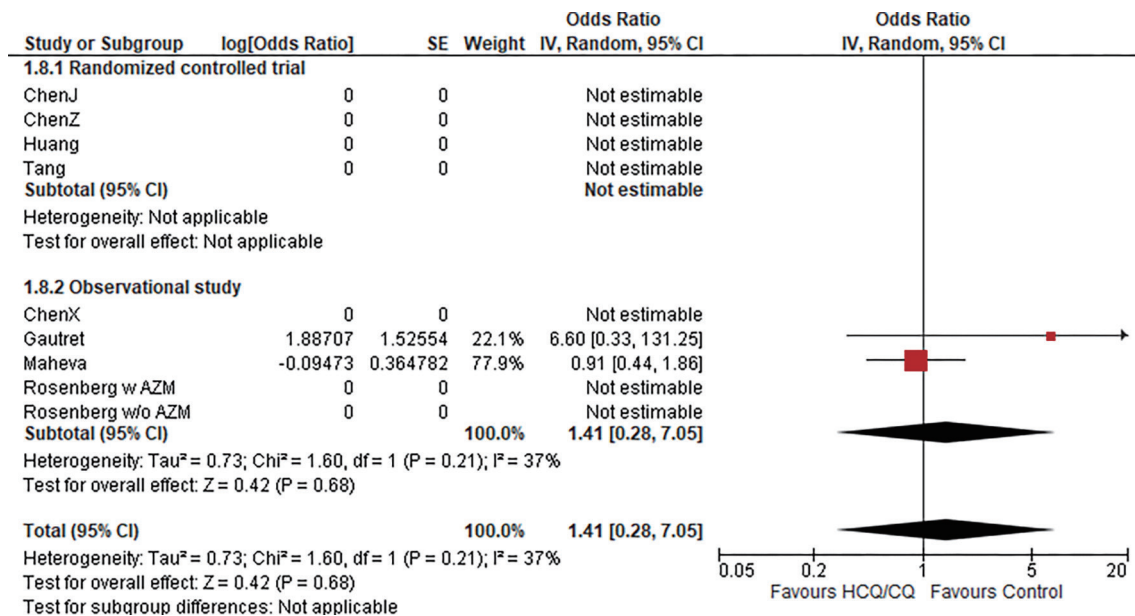

**Figure S5** A forest plot for disease progression (death or intensive care unit admission). Rosenberg w AZM (with AZM): “HCQ + AZM versus AZM alone”. Rosenberg w/o AZM (without AZM): “HCQ alone versus neither of them”. SE, standard error; 95% CI, 95% confidence interval; IV, inverse variance; M-H, Mantel-Haenszel; HCQ/CQ, hydroxychloroquine/chloroquine; AZM, azithromycin.



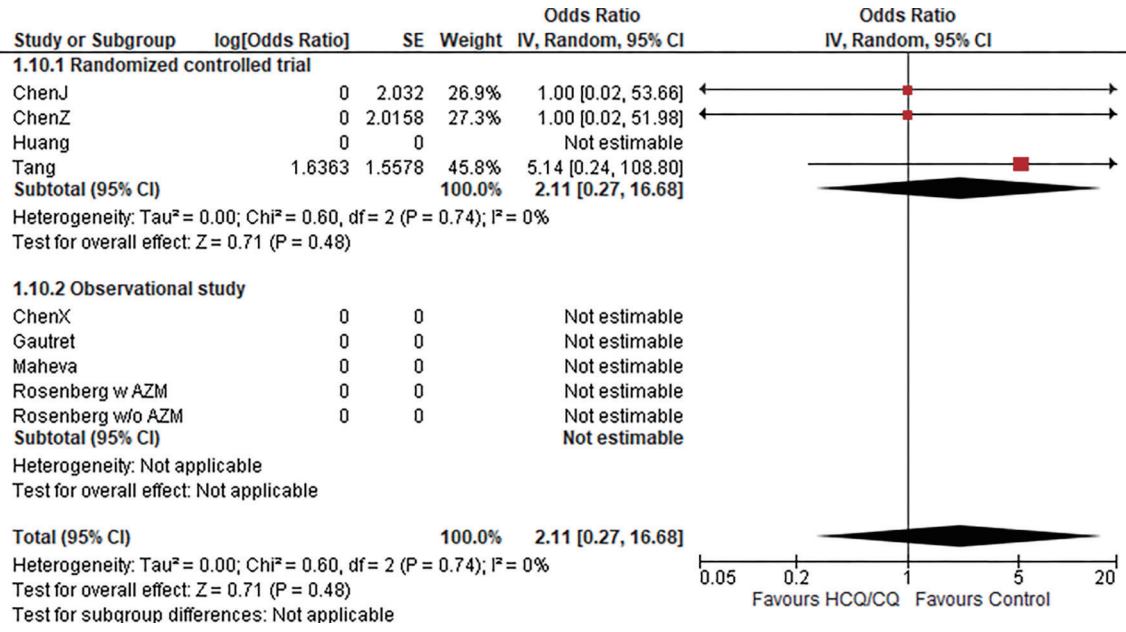

**Figure S6** A forest plot for serious adverse event. Rosenberg w AZM (with AZM): “HCQ + AZM versus AZM alone”. Rosenberg w/o AZM (without AZM): “HCQ alone versus neither of them”. SE, standard error; 95% CI, 95% confidence interval; IV, inverse variance; M-H, Mantel-Haenszel; HCQ/CQ, hydroxychloroquine/chloroquine; AZM, azithromycin.

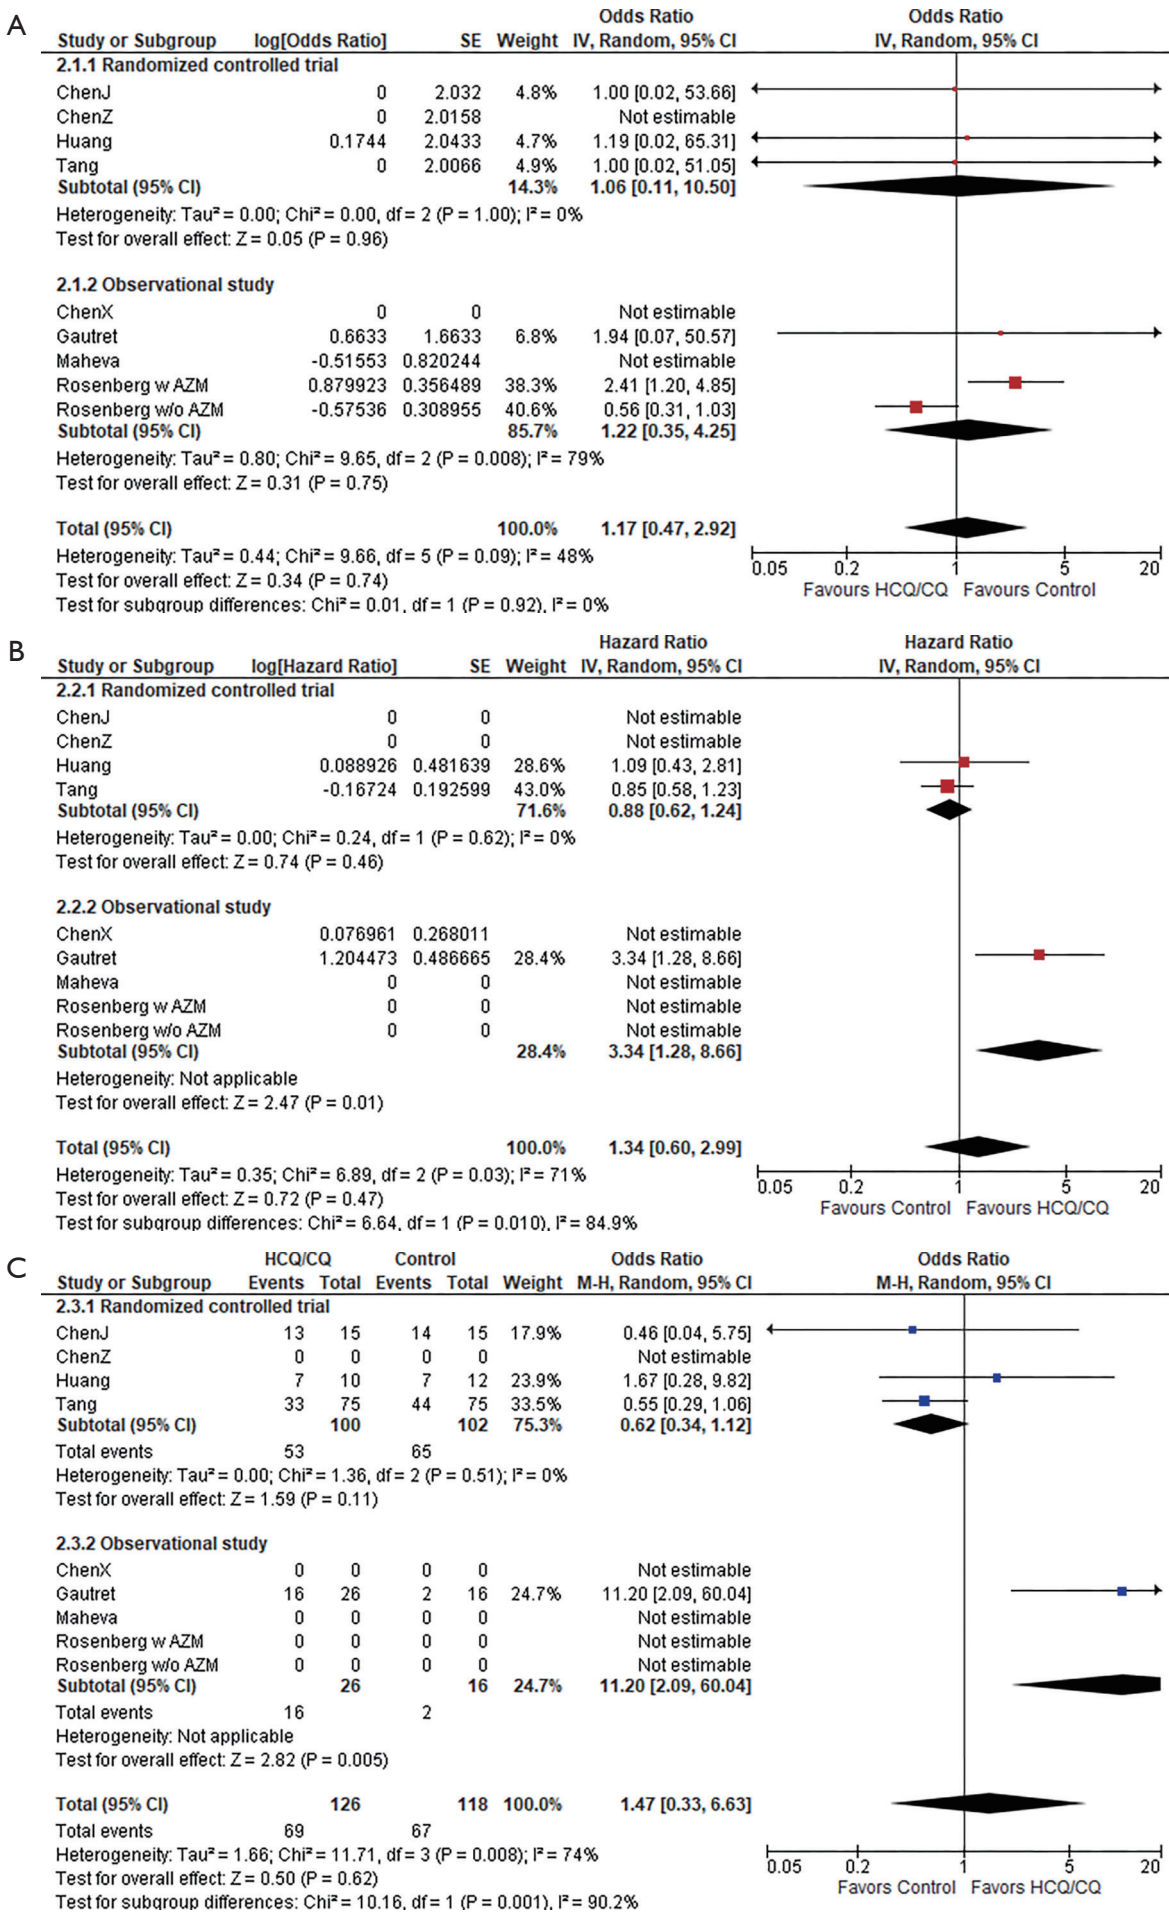

**Figure S7** A forest plot for primary outcomes excluding non-peer reviewed articles. (A) All cause death; (B) time to viral clearance; (C) viral clearance at day 7. Rosenberg w AZM (with AZM): “HCQ + AZM versus AZM alone”. Rosenberg w/o AZM (without AZM): “HCQ alone versus neither of them”. SE, standard error; 95% CI, 95% confidence interval; IV, inverse variance; M-H, Mantel-Haenszel; HCQ/CQ, hydroxychloroquine/chloroquine; AZM, azithromycin.
